# Supplementary material
Source: PubMed Central journal article supplement (PMC1567917)

**A**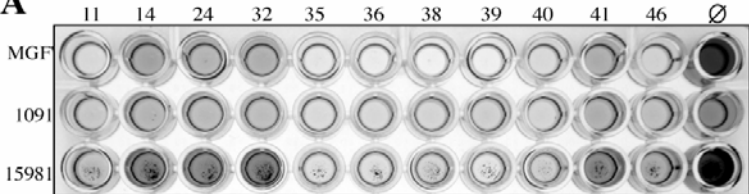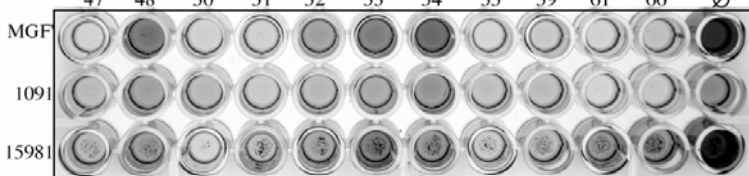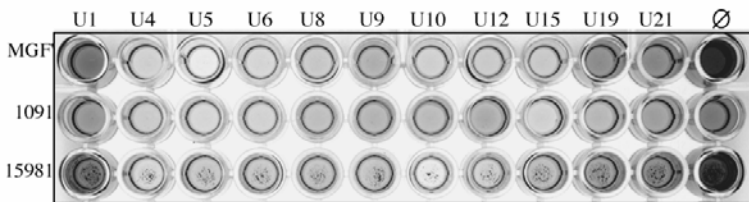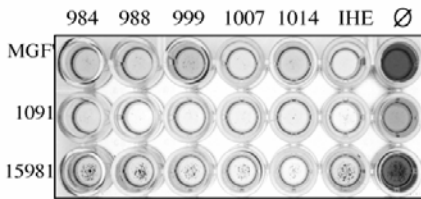**B**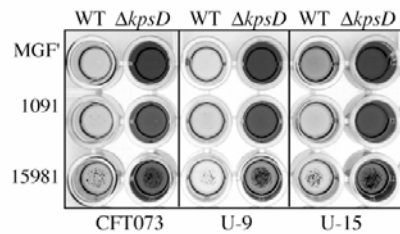**C**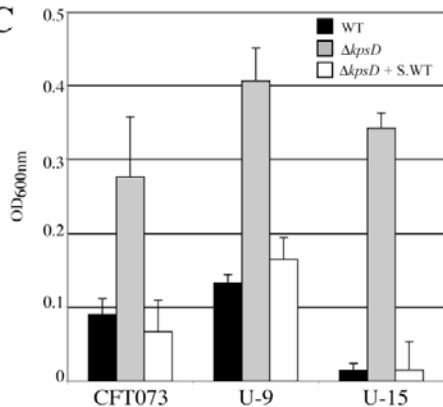

Supplement: pnas_0605399103_1.pdf [file pnas_0605399103_1.pdf]
